# Supplementary material for: Histidine Protonation and Conformational Switching in Diphtheria Toxin Translocation Domain
Source: MDPI journal article supplement (doi:10.3390/toxins15070410), 2023-06-25
Supplement: s1 [file s1]

# **Supplementary Materials for:**

## **Histidine Protonation and Conformational Switching in Diphtheria Toxin Translocation Domain**

*Mykola V. Rodnin<sup>1</sup>, Victor Vasques-Montes<sup>1</sup>, Alexander Kyrychenko<sup>1,2</sup>, Nuno F.B. Oliveira<sup>3</sup>, Maithri M. Kashipathy<sup>4</sup>, Kevin P. Battaile<sup>5</sup>, Justin Douglas<sup>6</sup>, Scott Lovell<sup>4</sup>, Miguel Machuqueiro<sup>3</sup> and Alexey S. Ladokhin<sup>1\*</sup>*

<sup>1</sup>University of Kansas School of Medicine, Department of Biochemistry and Molecular Biology, Kansas City, KS, USA

<sup>2</sup>Institute of Chemistry and School of Chemistry, V. N. Karazin Kharkiv National University, Kharkiv 61022, Ukraine

<sup>3</sup>Institute of Biosystems and Integrative Sciences, University of Lisbon, Lisbon, Portugal

<sup>4</sup>Protein Structure and X-ray Crystallography Laboratory, University of Kansas, Lawrence, KS, USA

<sup>5</sup>NYX, New York Structural Biology Center, Upton, NY, USA

<sup>6</sup>COBRE Bio-NMR Laboratory, University of Kansas, Lawrence, KS, USA

Phone: 913-588-0489 FAX: 913-588-7440 e-mail: aladokhin@kumc.edu

**Table S1.** pKa values of the titratable residues in the diphtheria toxin T-domain calculated using web-based H<sup>++</sup> tools from X-ray structures reported here and in [2].

| Residue        | WT<br>(PDB 7K7E<br>pH 7.0) [2] | WT<br>(PDB 7K7C<br>pH 5.5) [2] | H223Q/H257Q<br>(PDB 8G0F<br>pH 5.5) |
|----------------|--------------------------------|--------------------------------|-------------------------------------|
| Asp 205        | 3.2                            | 3.2                            | 3.2                                 |
| Asp 207        | 4.0                            | 4.0                            | 3.9                                 |
| Asp 211        | 4.1                            | 3.9                            | 3.7                                 |
| Glu 218        | 4.0                            | 4.0                            | 4.2                                 |
| Glu 222        | 3.7                            | 3.7                            | 4.2                                 |
| <b>His 223</b> | <b>4.6</b>                     | <i>Not resolved</i>            | -                                   |
| Glu 232        | 4.1                            | 4.0                            | 3.3                                 |
| Glu 240        | 2.3                            | 2.8                            | 3.4                                 |
| Glu 241        | 4.0                            | 3.9                            | 4.1                                 |
| Glu 248        | 4.1                            | 4.0                            | 4.6                                 |
| Glu 249        | 3.6                            | 3.6                            | 2.9                                 |
| <b>His 251</b> | <b>5.5</b>                     | <b>5.6</b>                     | <b>6.1</b>                          |
| Glu 256        | 3.4                            | 3.2                            | 3.9                                 |
| <b>His 257</b> | <b>2.5</b>                     | <b>4.3</b>                     | -                                   |
| Glu 259        | 1.9                            | 1.8                            | 4.0                                 |
| Glu 262        | 3.5                            | 4.0                            | 4.0                                 |
| Asp 290        | 3.4                            | 3.3                            | 3.2                                 |
| Glu 292        | 4.2                            | 4.3                            | 4.3                                 |
| Asp 295        | 4.0                            | 3.9                            | 3.8                                 |
| Glu 298        | 4.2                            | 4.2                            | 4.2                                 |
| Asp 318        | 3.3                            | 3.1                            | 3.4                                 |
| <b>His 322</b> | <b>6.7</b>                     | <b>6.7</b>                     | <b>6.9</b>                          |
| <b>His 323</b> | <b>4.0</b>                     | <b>4.5</b>                     | <b>2.9</b>                          |
| Glu 326        | 2.8                            | 2.7                            | 3.2                                 |
| Glu 327        | 2.0                            | 1.1                            | 0.8                                 |
| Glu 349        | 5.1                            | 5.2                            | 5.0                                 |
| Asp 352        | 2.8                            | 2.8                            | 2.9                                 |
| Glu 362        | 2.7                            | 2.7                            | 3.0                                 |
| <b>His 372</b> | <b>3.1</b>                     | <b>3.3</b>                     | <b>3.5</b>                          |

## References:

1. Gordon, J.C.; Myers, J.B.; Folta, T.; Shoja, V.; Heath, L.S.; Onufriev, A. H<sup>++</sup>: a server for estimating pK<sub>a</sub> and adding missing hydrogens to macromolecules. *Nucleic Acids Res.* **2005**, *33*, W368-W371, doi:10.1093/nar/gki464.
2. Rodnin, M.V.; Kashipathy, M.M.; Kyrychenko, A.; Battaile, K.P.; Lovell, S.; Ladokhin, A.S. Structure of the Diphtheria Toxin at Acidic pH: Implications for the Conformational Switching of the Translocation Domain. *Toxins* **2020**, *12*, 704, doi:10.3390/toxins12110704.
